# Supplementary material for: Crystal structure of the RNA-recognition motif of Drosophila melanogaster tRNA (uracil-5-)-methyltransferase homolog A
Source: PubMed Central journal article supplement (PMC10836426; doi:10.1107/s2053230x24000645), 2024-01-25
Supplement: f-80-00036-sup1.pdf [file f-80-00036-sup1.pdf]

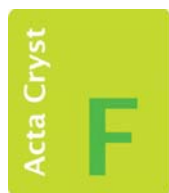

STRUCTURAL BIOLOGY  
COMMUNICATIONS

**Volume 80 (2024)**

**Supporting information for article:**

**Crystal structure of the RNA-recognition motif of *Drosophila melanogaster* tRNA (uracil-5-)-methyltransferase homolog A (TRMT2A)**

**Dierk, Monika Witzenbergen, Robert Janowski and Dierk Niessing**

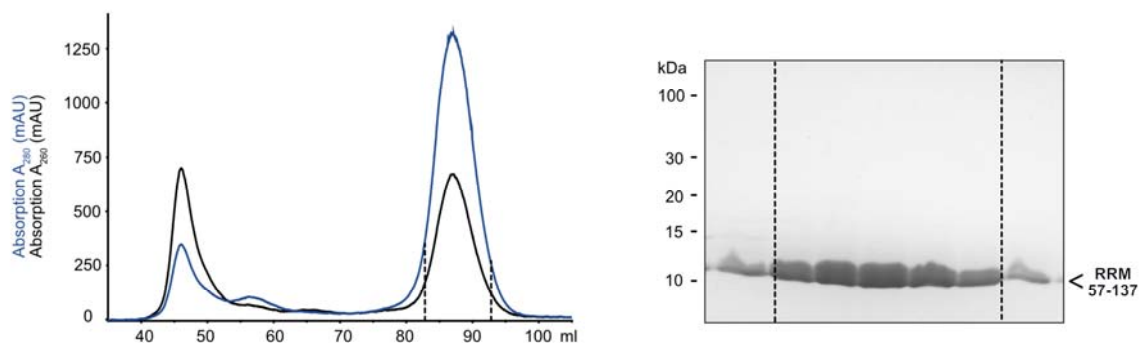

**Figure S1** Elution profile of size-exclusion chromatography using a Superdex 75, (S75, 10/300 GL) column shows the last step of *dm*TRMT2A RRM (57-137) purification. A corresponding SDS PAGE (right) from fractions between both dotted lines in the elution profile (left) shows the expected size of the RRM at around 10-11 kDa (calculated molecular weight: 9.8 kDa). Dashed lines on the gel image (right) show fractions used for concentration and subsequent crystallization.

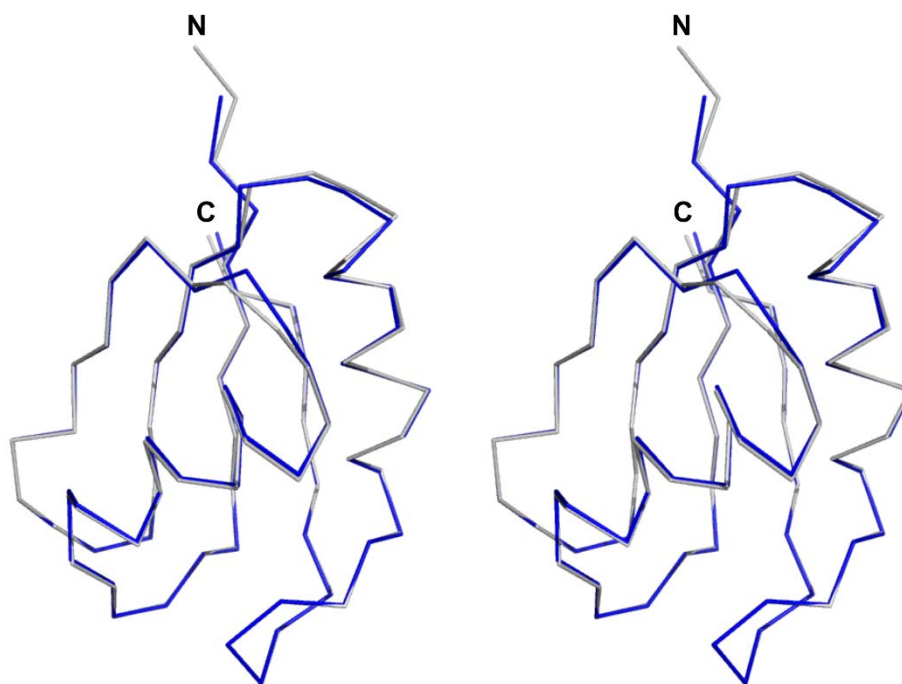

**Figure S2** The crystals of *dmTRMT2A* RRM contain two molecules in the asymmetric unit with r.m.s.d value of 0.39 Å for 74 superimposed  $C\alpha$  atoms. The figure shows a stereo view of the overlap of both independent chains: A – navy blue and B – grey. The figure was prepared with *PyMOL* (Schrödinger and DeLano, 2020).

**Table S1** Conservation of the amino acid residues in position 2 of the RNP2 and in position 3 and 5 of the RNP1 in the analysed RRM structures.

The values in the table include r.m.s.d. in Å and sequence identity in % (%seq).

| <b>PDB ID</b> | <b>Organism</b>        | <b>RNP2 Position 2</b> | <b>RNP1 Position 3</b> | <b>RNP1 Position 5</b> | <b>r.m.s.d.</b> | <b>%seq</b> | <b>Reference</b>                |
|---------------|------------------------|------------------------|------------------------|------------------------|-----------------|-------------|---------------------------------|
| 7PV5          | <i>D. melanogaster</i> | E64                    | F99                    | <b>F101</b>            | -               | -           | This study                      |
| 7NTO          | <i>H. sapiens</i>      | E76                    | C111                   | <b>F113</b>            | 1.65            | 32          | Margreiter <i>et al.</i> , 2022 |
| 1B7F          | <i>D. melanogaster</i> | I128                   | Y168                   | <b>F170</b>            | 1.27            | 29          | Handa <i>et al.</i> , 1999      |
| 3L3C          | <i>H. sapiens</i>      | Y13                    | Q54                    | <b>F56</b>             | 1.33            | 18          | Cochrane <i>et al.</i> , 2009   |
| 3D2W          | <i>M. musculus</i>     | F194                   | F229                   | <b>F231</b>            | 1.79            | 22          | Kuo <i>et al.</i> , 2009        |
| 4IUF          | <i>H. sapiens</i>      | L107                   | F147                   | <b>F149</b>            | 1.51            | 17          | Kuo <i>et al.</i> , 2014        |
| 6DG0          | <i>C. elegans</i>      | F24                    | V60                    | <b>F62</b>             | 1.43            | 16          | unpublished                     |
